# Supplementary material
Source: Springer Nature journal article supplement (https://www.springermedizin.de/resource/supplementary/12967_2011_769_MOESM4_ESM.pdf/9577474)
Supplement: MOESM4 [file 9577474]

**F11R mRNA levels  
Normalized to GAPDH**

**a**

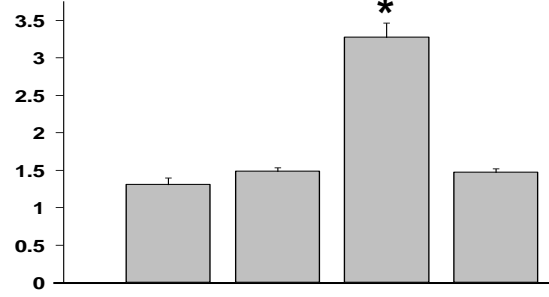

**Untreated**

**Parthenolide**

**TNF $\alpha$**

**TNF $\alpha$  &  
Parthenolide**

**b**

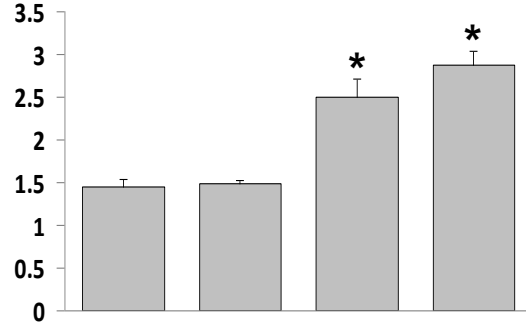

**Untreated**

**Parthenolide**

**IFN $\gamma$**

**IFN $\gamma$  &  
Parthenolide**

**c**

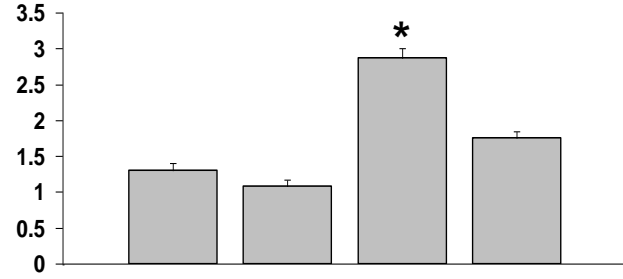

**Untreated**

**AG-490**

**IFN $\gamma$**

**IFN $\gamma$  & AG-490**
